# Supplementary material for: Thrombectomy aspiration post-market study in acute stroke with the Q aspiration catheter: the TAPAS study
Source: PubMed Central journal article supplement (PMC10314076; doi:10.1136/neurintsurg-2022-018649), 2022-05-31

**SUPPLEMENTAL MATERIAL****Thrombectomy Aspiration Post-Market Study in Acute Stroke with the Q Aspiration Catheter: The TAPAS Study****SUPPLEMENTAL TABLES****Supplemental Table 1. Comparison between baseline characteristics of TAPAS population and other populations of large bore catheter studies.**

|                               | <b>BRETZNER<br/>2019</b> | <b>MARNAT<br/>2019</b> | <b>BILGIN<br/>2021</b> | <b>TAPAS</b> | <b>t</b> | <b>FD</b> | <b>Sig<br/>(bilateral)</b> |
|-------------------------------|--------------------------|------------------------|------------------------|--------------|----------|-----------|----------------------------|
| <b>AGE</b>                    | 68                       | 69,5                   | 63,8                   | 72,4         | -1,553   | 2         | 0,261                      |
| <b>MEN</b>                    | 42                       | 50,7                   | 54,7                   | 53,3         | -0,556   | 2         | 0,634                      |
| <b>HYPERTENSION</b>           | 62                       | 54,9                   | 67,5                   | 71,1         | -1,321   | 2         | 0,317                      |
| <b>DIABETES</b>               | 12                       | 17,4                   | 24,3                   | 28,9         | -1,545   | 2         | 0,262                      |
| <b>DYSLIPEMIA</b>             | 38                       | 32,7                   |                        | 59,1         | -5,174   | 1         | 0,122                      |
| <b>TOBACCO</b>                | 27                       | 25,7                   |                        | 47,7         | -18,964  | 1         | 0,034                      |
| <b>ADMISSION NIHSS</b>        | 17                       | 16                     | 14                     | 14,2         | 0,832    | 2         | 0,493                      |
| <b>M1-OCCLUSION</b>           | 61,7                     | 41,9                   |                        | 55,5         | -0,216   | 1         | 0,865                      |
| <b>M2-OCCLUSION</b>           | 11,7                     | 13,5                   |                        | 15,6         | -1,925   | 1         | 0,305                      |
| <b>ICA-OCCLUSION</b>          | 16,7                     | 18,2                   | 31,7                   | 22,2         | 0,000    | 2         | 1,000                      |
| <b>BASILAR-<br/>OCCLUSION</b> | 10                       | 13,2                   | 10,8                   | 6,7          | 2,409    | 2         | 0,138                      |

**Supplemental Table 2. Procedural anesthesia details by center.**

| <b>SITE</b>     | <b>POPULATION</b> | <b>GENERAL ANESTHESIA</b> | <b>CONSCIOUS SEDATION</b> |
|-----------------|-------------------|---------------------------|---------------------------|
| <b>Center 1</b> | 19                | 19                        | 0                         |
| <b>Center 2</b> | 14                | 2                         | 12                        |
| <b>Center 3</b> | 7                 | 5                         | 2                         |
| <b>Center 4</b> | 5                 | 5                         | 0                         |
| <b>TOTAL</b>    | 45                | 31 (68.9%)                | 14 (31.1%)                |

**Supplemental Table 3. Other devices used (cases in which navigation could not be achieved by the combination of Q Catheter and SR, and/or cases in which initial recanalization was not considered satisfactory). Several devices could be used in the same patient if considered necessary.**

| <b>DEVICES</b>     | <b>N</b> |
|--------------------|----------|
| ACE 68             | 5        |
| 3 MAX              | 3        |
| Solitaire          | 4        |
| Catch              | 4        |
| Embotrap           | 2        |
| Trevo              | 3        |
| Intracranial stent | 3        |

**SUPPLEMENTAL FIGURES****Supplemental Figure 1: Q Catheter design, shown with and without 8F guide catheter.**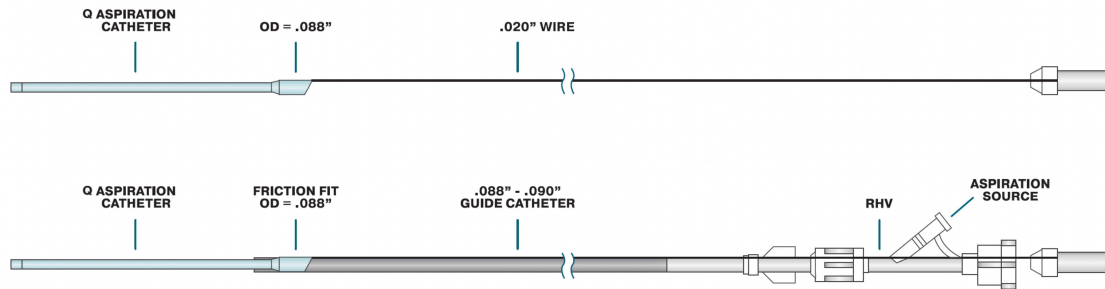

**Supplemental Figure 2: Q Catheter flow chart of study participants.**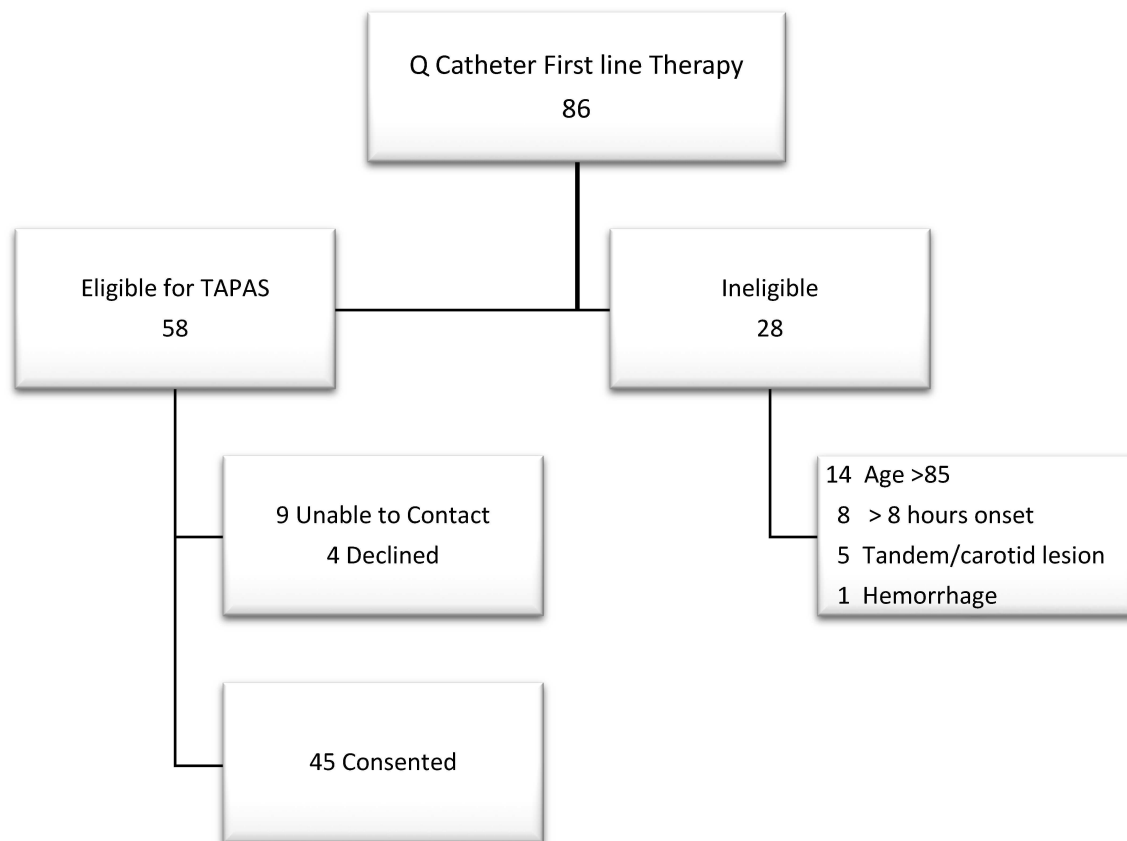

Supplement: neurintsurg-2022-018649supp001.pdf [file neurintsurg-2022-018649supp001.pdf]
